# Supplementary material for: JAK inhibitors dampen activation of interferon-stimulated transcription of ACE2 isoforms in human airway epithelial cells
Source: PubMed Central journal article supplement (PMC8172581; doi:10.1038/s42003-021-02167-1), 2021-06-02
Supplement: 42003_2021_2167_MOESM3_ESM.pdf [file 42003_2021_2167_MOESM3_ESM.pdf]

## Description of Additional Supplementary Files

**File Name:** Supplementary Data 1

**Description:** mRNA levels of genes associated with the pan JAK-STAT pathway in SAECs.

**File Name:** Supplementary Data 2

**Description:** List of all genes with normalized read counts in each replicate at Control and IFN $\alpha$  treated SAECs,  $\log_2$  (fold change), p-value and adjusted p-value as well as upregulated gene list and GSEA analysis.

**File Name:** Supplementary Data 3

**Description:** List of all genes with normalized read counts in each replicate at Control and IFN $\beta$  treated SAECs,  $\log_2$  (fold change), p-value and adjusted p-value as well as upregulated gene list and GSEA analysis.

**File Name:** Supplementary Data 4

**Description:** List of all genes with normalized read counts in each replicate at Control and IFN $\gamma$  treated SAECs,  $\log_2$  (fold change), p-value and adjusted p-value as well as upregulated gene list and GSEA analysis.

**File Name:** Supplementary Data 5

**Description:** List of all genes with normalized read counts in each replicate at Control and IFN $\lambda$ 3 treated SAECs,  $\log_2$  (fold change), p-value and adjusted p-value as well as upregulated gene list and GSEA analysis.

**File Name:** Supplementary Data 6

**Description:** List of all genes with normalized read counts in each replicate at Control and IL6 treated SAECs,  $\log_2$  (fold change), p-value and adjusted p-value as well as upregulated gene list and GSEA analysis.

**File Name:** Supplementary Data 7

**Description:** List of all genes with normalized read counts in each replicate at Control and IL7 treated SAECs,  $\log_2$  (fold change), p-value and adjusted p-value as well as upregulated gene list and GSEA analysis.

**File Name:** Supplementary Data 8

**Description:** List of all genes with normalized read counts in each replicate at Control and GH treated SAECs,  $\log_2$  (fold change), p-value and adjusted p-value as well as upregulated gene list and GSEA analysis.

**File Name:** Supplementary Data 9

**Description:** List of genes induced by IFN $\alpha$ ,  $\beta$ ,  $\gamma$  and  $\lambda$ . Expression prior to and after interferon stimulation and upon treatment with ruxolitinib and baricitinib is shown.

**File Name:** Supplementary Data 10

**Description:** List of all genes with normalized read counts in each replicate at IFN $\beta$  and baricitinib with IFN $\beta$ , treated SAECs,  $\log_2$  (fold change), p-value and adjusted p-value as well as upregulated gene list and GSEA analysis.

**File Name:** Supplementary Data 11

**Description:** List of all genes with normalized read counts in each replicate at IFN $\beta$  and ruxolitinib with IFN $\beta$ , treated SAECs,  $\log_2$  (fold change), p-value and adjusted p-value as well as upregulated gene list and GSEA analysis.
